# Supplementary material for: Parkinson’s disease is characterized by vitamin B6-dependent inflammatory kynurenine pathway dysfunction
Source: Research Square preprint supplement (doi:10.21203/rs.3.rs-4980210/v1), 2024-09-26
Supplement: Supplementary file 1 [file 4744af1c3f1b506bb25678ce.docx]

Parkinson’s disease is characterized by vitamin B6-dependent inflammatory kynurenine pathway dysfunction

Edward N. Wilson1,2,3,*, Jacob Umans1, Michelle S. Swarovski1, Paras S. Minhas1, Øivind Midttun4, Arve Ulvik4, Marian Shahid-Besanti1, Patricia Linortner1, Siddhita D. Mhatre1, Qian Wang1, Divya Channappa1,5, Nicole K. Corso1, Lu Tian6, Carolyn A. Fredericks7, Geoffrey A. Kerchner8, Edward D. Plowey5, Brenna Cholerton1, Per M. Ueland4, Cyrus P. Zabetian9,10, Nora E. Gray11, Joseph F. Quinn11,12, Thomas J. Montine5, Sharon J. Sha1,2, Frank M. Longo1,2, David A. Wolk13, Alice Chen-Plotkin13, Victor W. Henderson1,2, Tony Wyss-Coray1,2,3, Anthony D. Wagner14,2, Elizabeth C. Mormino1,2, Nima Aghaeepour6,15,16,17, Kathleen L. Poston1,2,3,18 & Katrin I. Andreasson1,2,3,19,*

1Neurology & Neurological Sciences, Stanford University, Stanford, CA, 94305, USA

2Wu Tsai Neurosciences Institute, Stanford University, Stanford, CA, USA

3The Phil & Penny Knight Initiative for Brain Resilience, Stanford University, Stanford, CA, USA

4Bevital, Bergen, Norway

5Pathology, Stanford University, Stanford, CA, USA

6Biomedical Data Science and Statistics, Stanford University, Stanford, CA, USA

7Neurology, Yale University, New Haven, CT, USA

8Pharma Research and Early Development, F. Hoffmann-La Roche, Ltd., Basel, Switzerland

9VA Puget Sound Health Care System, Seattle, WA

10Neurology, University of Washington, Seattle, WA

11Neurology, Oregon Health & Sciences University, Portland, OR

12Neurology, Portland VA Medical Center, Portland, OR

13Neurology, University of Pennsylvania, Philadelphia, PA

14Psychology, Stanford University, Stanford, CA, USA

15Anesthesiology, Perioperative and Pain Medicine, Stanford University, Stanford, CA, 94305, USA

16Neonatal & Developmental Medicine, Department of Pediatrics, Stanford University, Stanford, CA, 94305, USA

17Biomedical Informatics, Stanford University, Stanford, CA, 94305, USA

18Neurosurgery, Stanford University, Stanford, CA, 94305, USA

19Chan Zuckerberg Biohub, San Francisco, CA 94158

*Correspondence should be addressed to: enwilson@stanford.edu & kandreas@stanford.edu

**
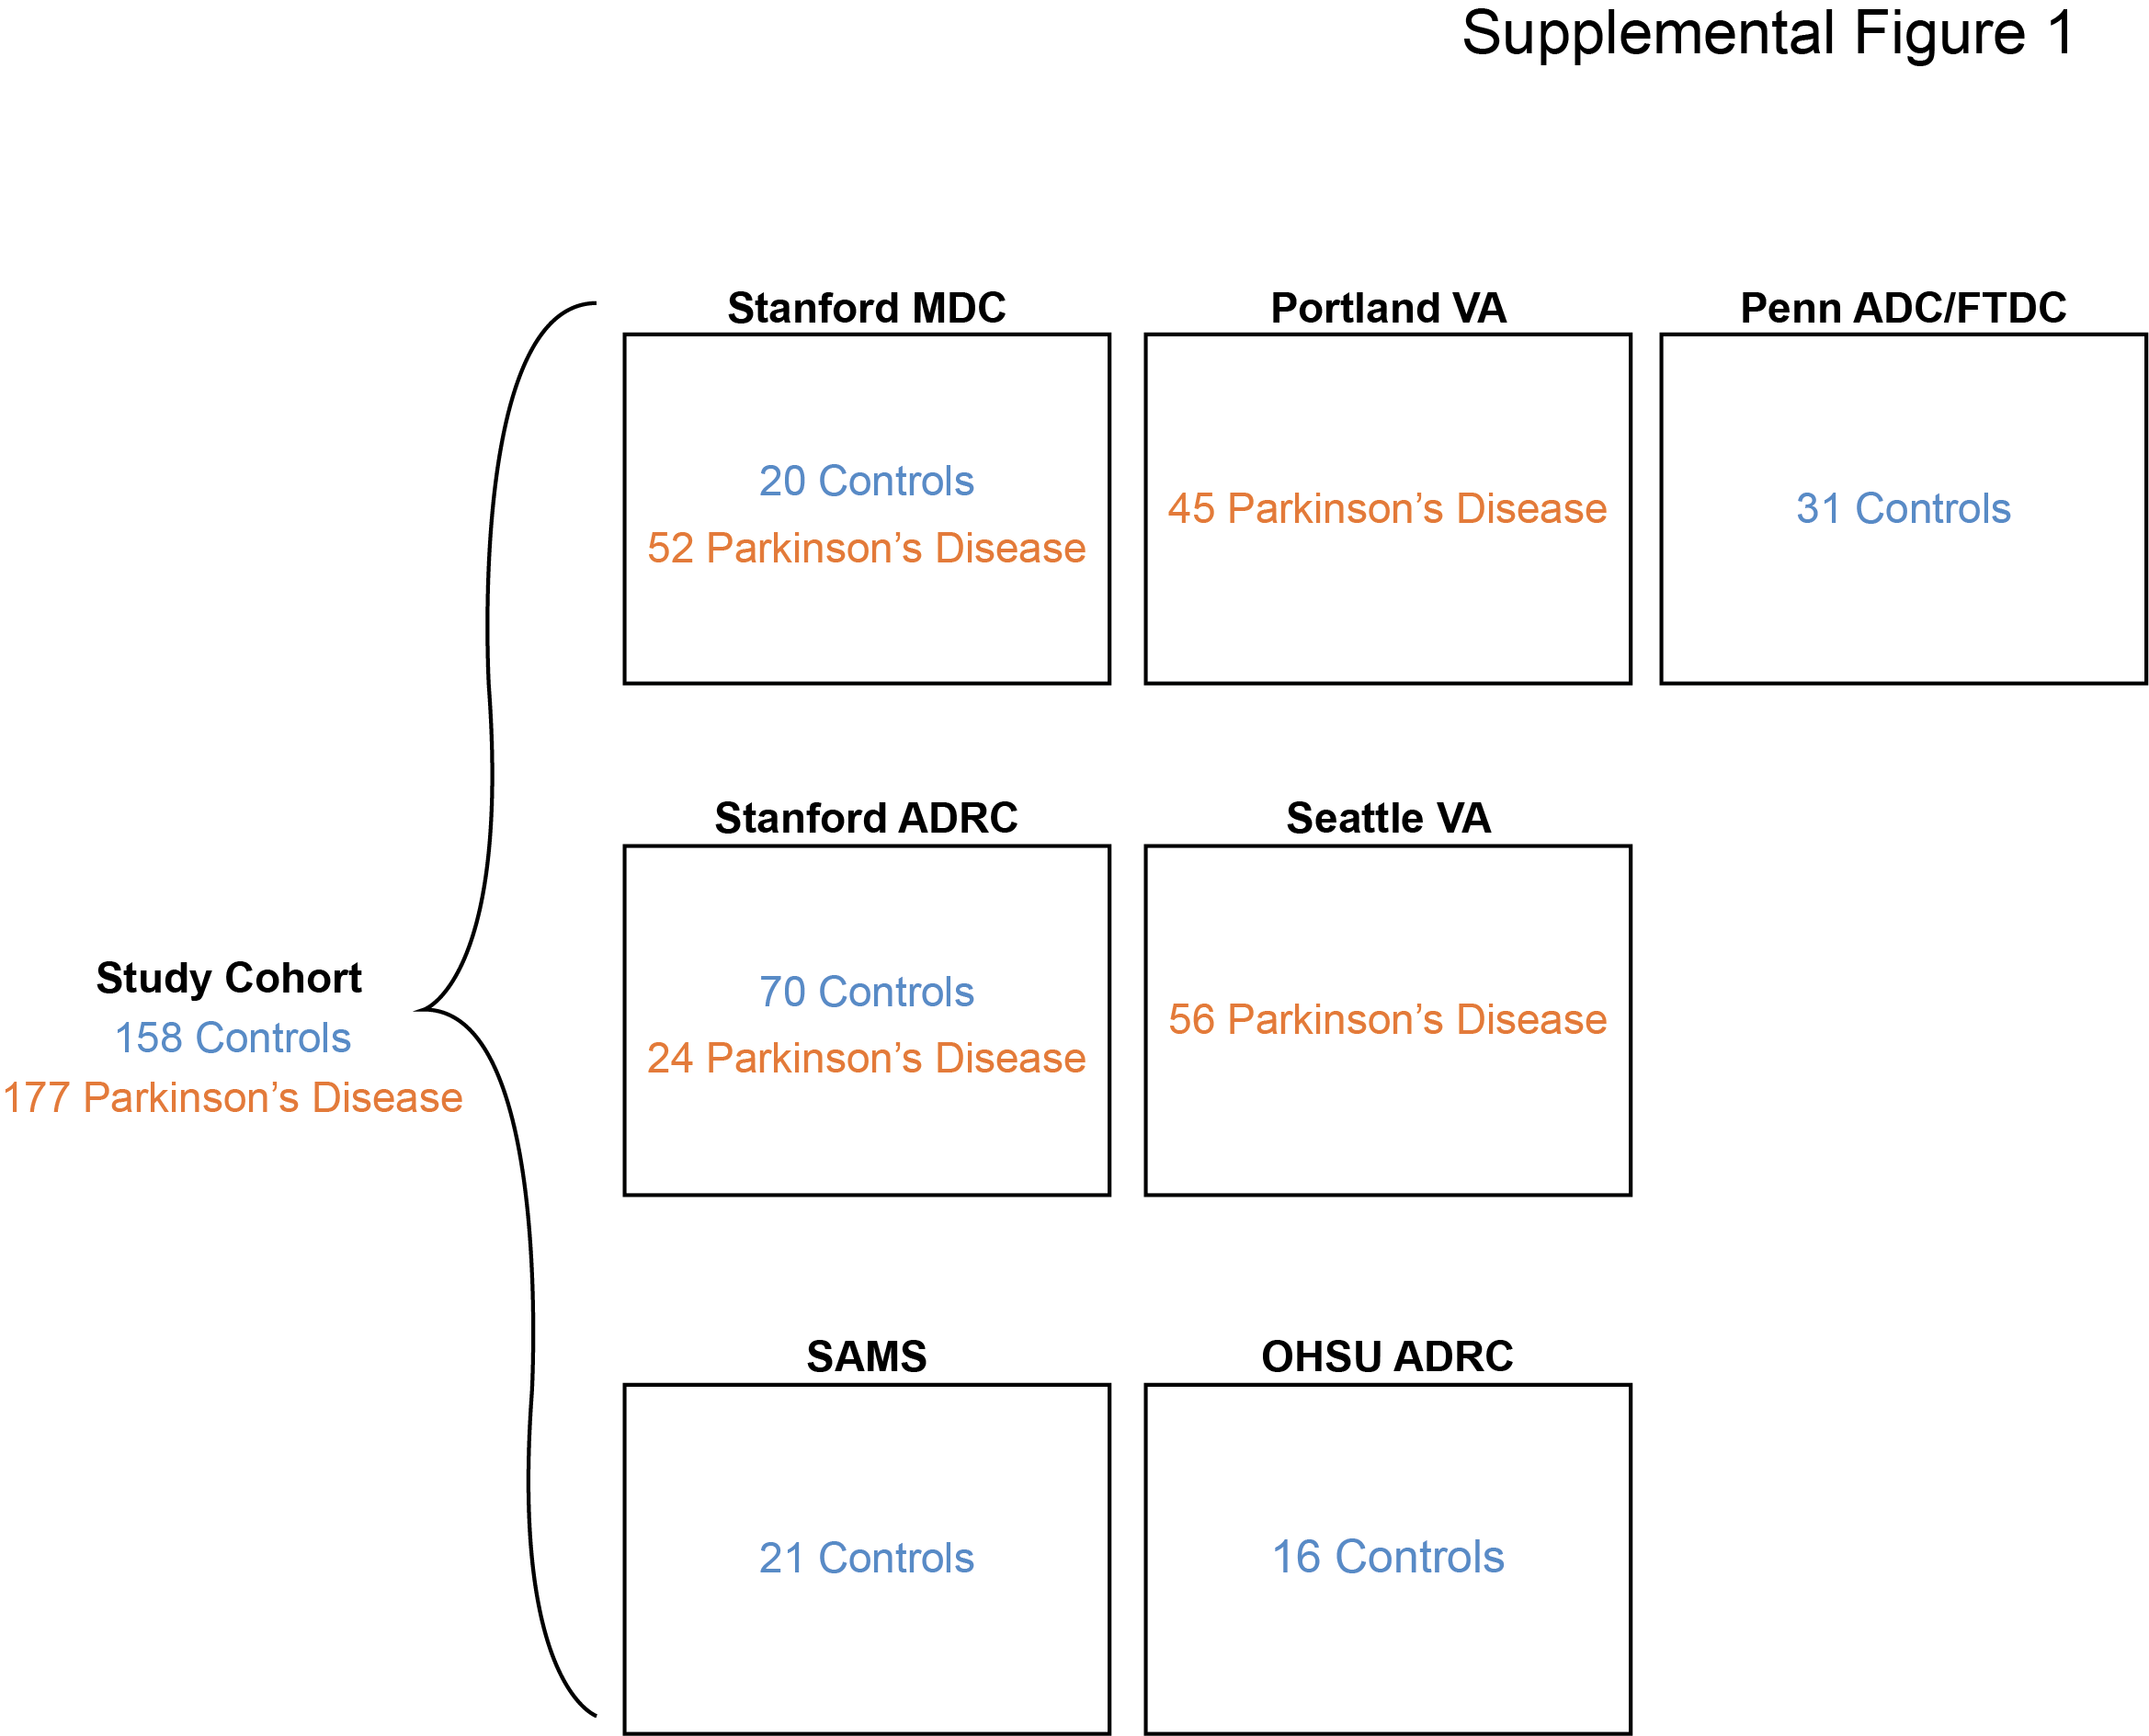
**

**Supplementary Fig. 1: Multicenter study of control participants and Parkinson’s disease participants.**

The combined study cohort consisted of a total of 158 control and 177 Parkinson’s disease participants. Number of participants and diagnostic group are indicated for each recruiting research center. This multicenter study included participants from 1) the Stanford Movement Disorders Clinic (Stanford MDC); 2) the Stanford Alzheimer’s Disease Research Center (Stanford ADRC); 3) the Stanford Aging and Memory Study (SAMS); 4) the VA Puget Sound Health Care System/University of Washington (Seattle VA); 5) the VA Portland Medical Center (Portland VA); 6) the Oregon Health & Science University Layton Aging and Alzheimer’s Disease Research Center (OHSU ADRC); 7) the University of Pennsylvania Alzheimer’s Disease Center (Penn ADC); and 8) the University of Pennsylvania Frontal Temporal Dementia Center (Penn FTDC). Demographic information on the study participants is included in **Table 1**.

**
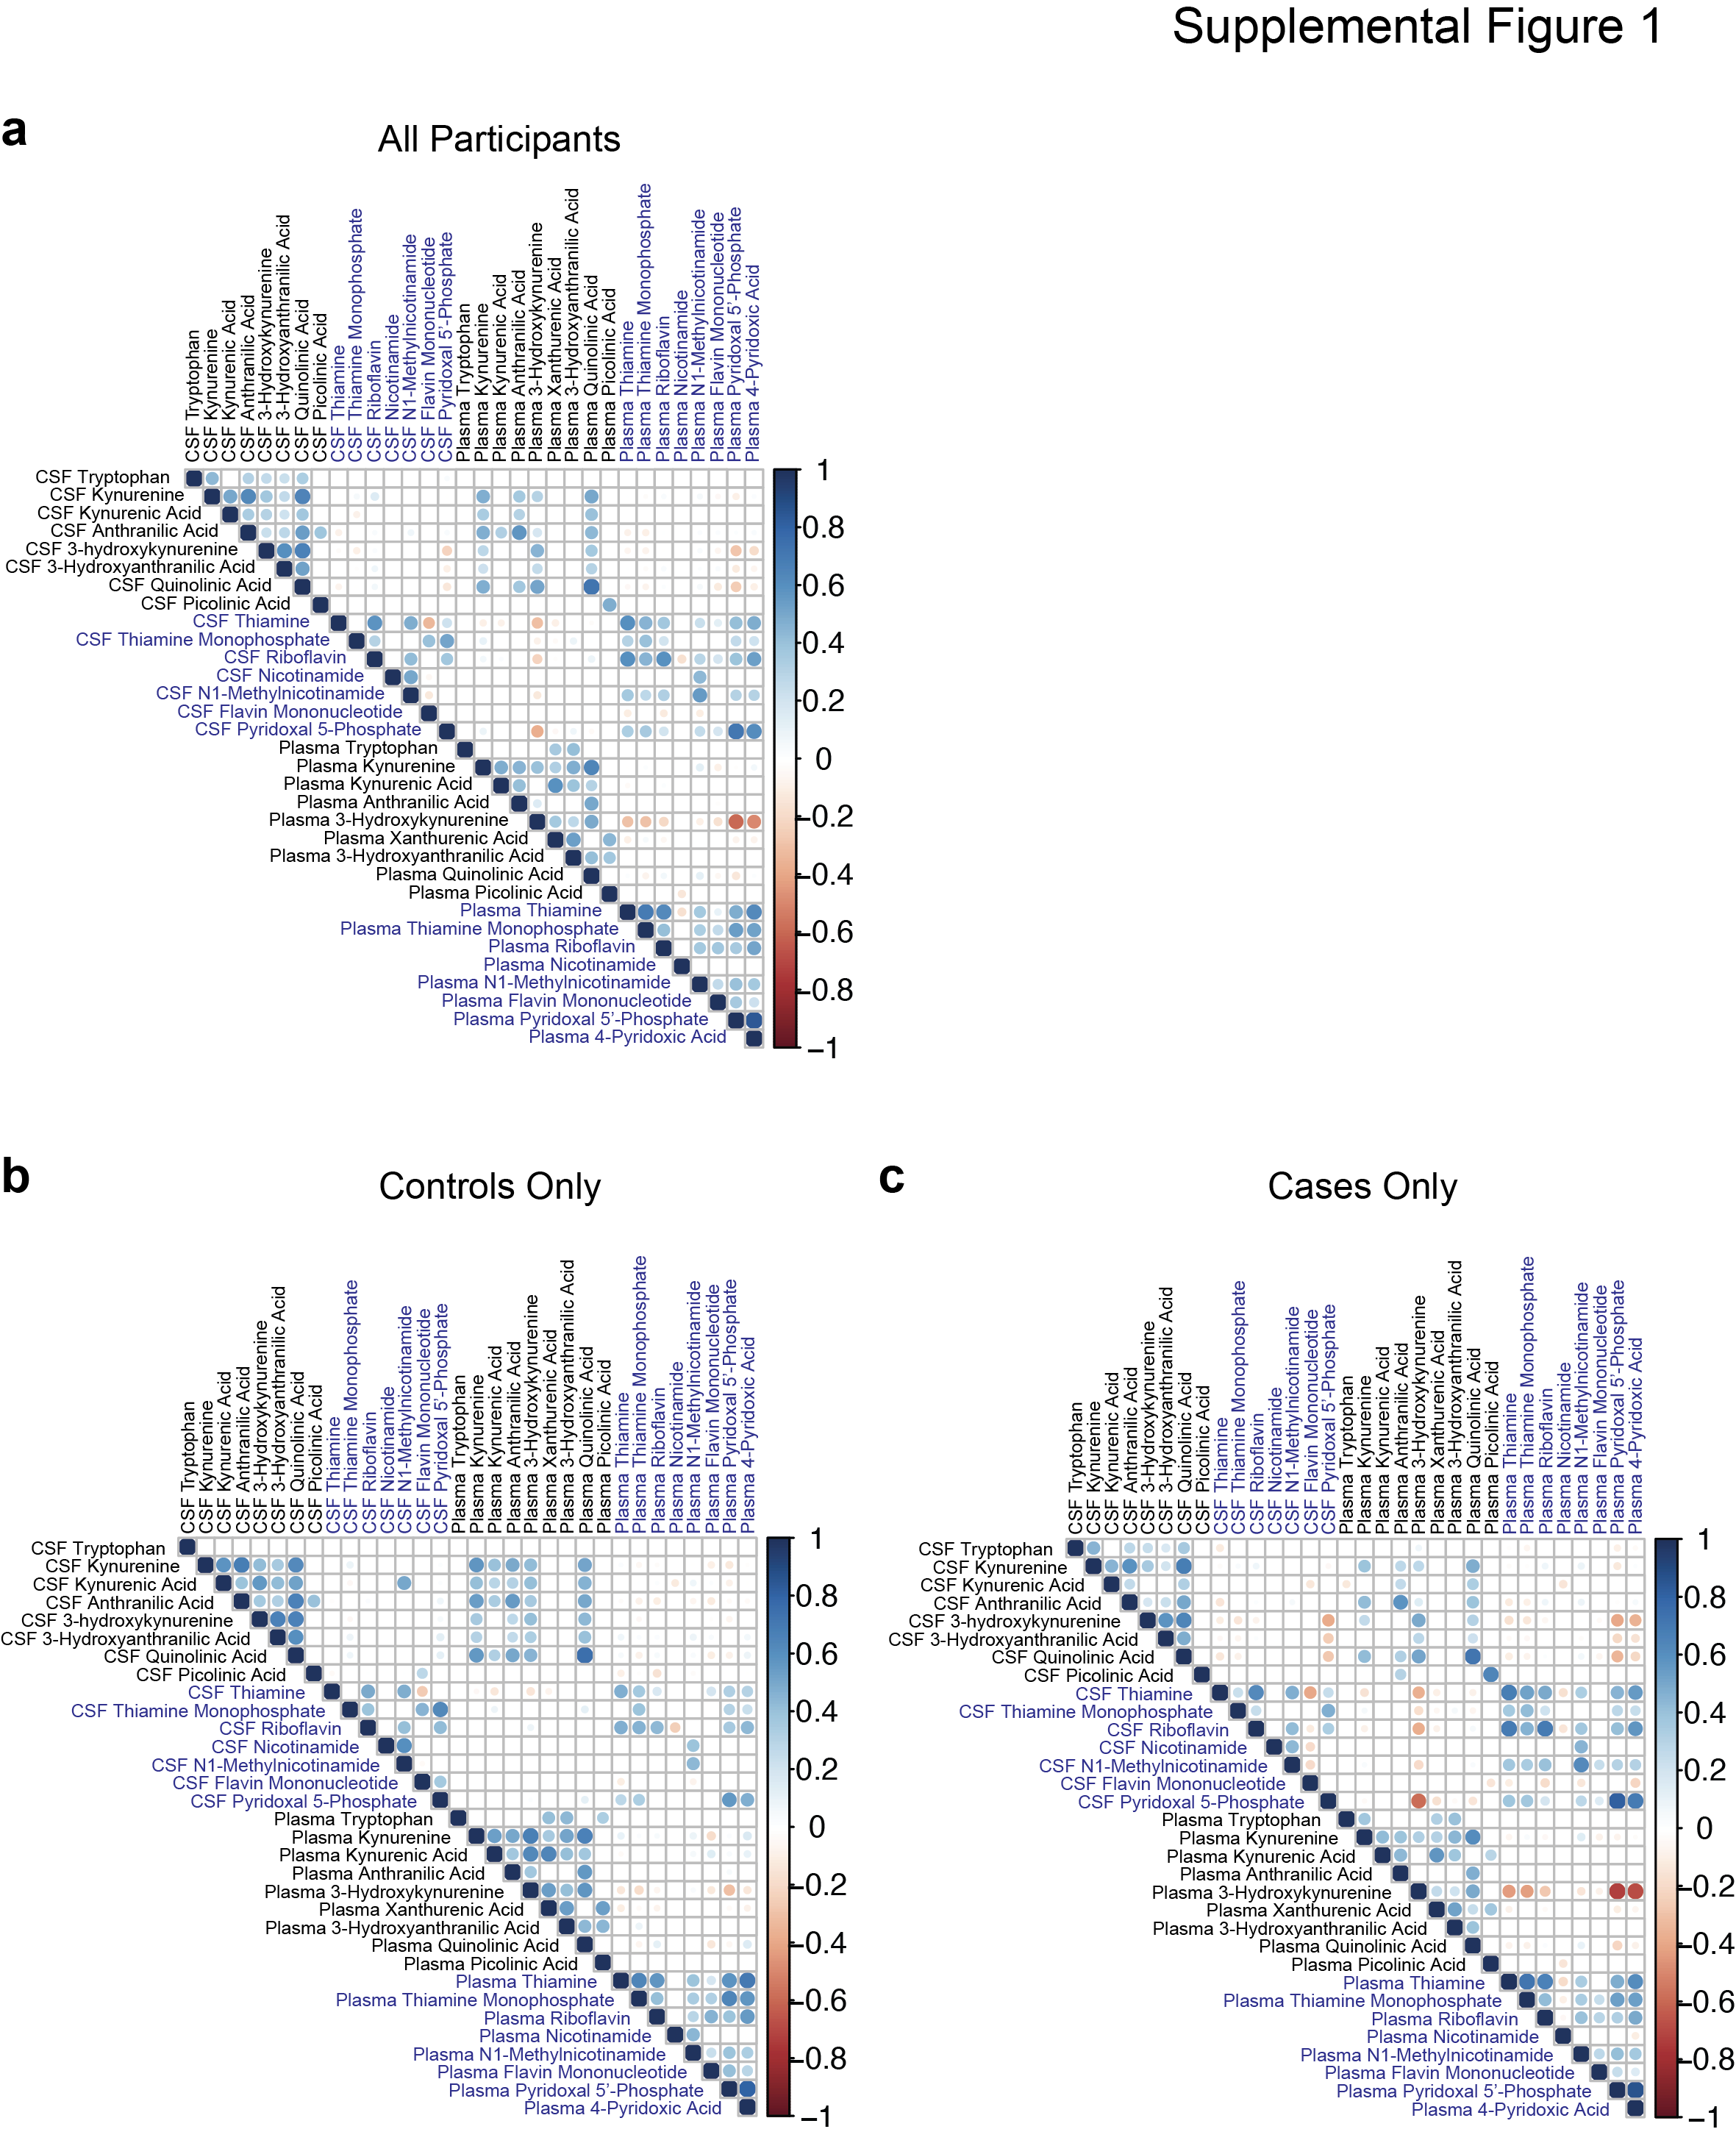
**

**Supplementary Fig. 2: Correlation Between CSF and Plasma Metabolic Pools.**

**(a)** Correlation matrix showing associations between CSF and plasma metabolites (black text) and related B-vitamins (blue text) in all participants. Significant correlations are shown with the circle size indicating the *P*-value of the correlation and color indicating size and direction of the *β*-estimate.

**(b)** Correlation matrix showing association between CSF and plasma metabolites (black text) and related B-vitamins (blue text) in control participants. Significant correlations are shown with the circle size indicating the *P*-value of the correlation and color indicating size and direction of the *β*-estimate.

**(c)** Correlation matrix showing association between CSF and plasma metabolites (black text) and related B-vitamins (blue text) in PD cases. Significant correlations are shown with the circle size indicating the *P*-value of the correlation and color indicating size and direction of the *β*-estimate.

**
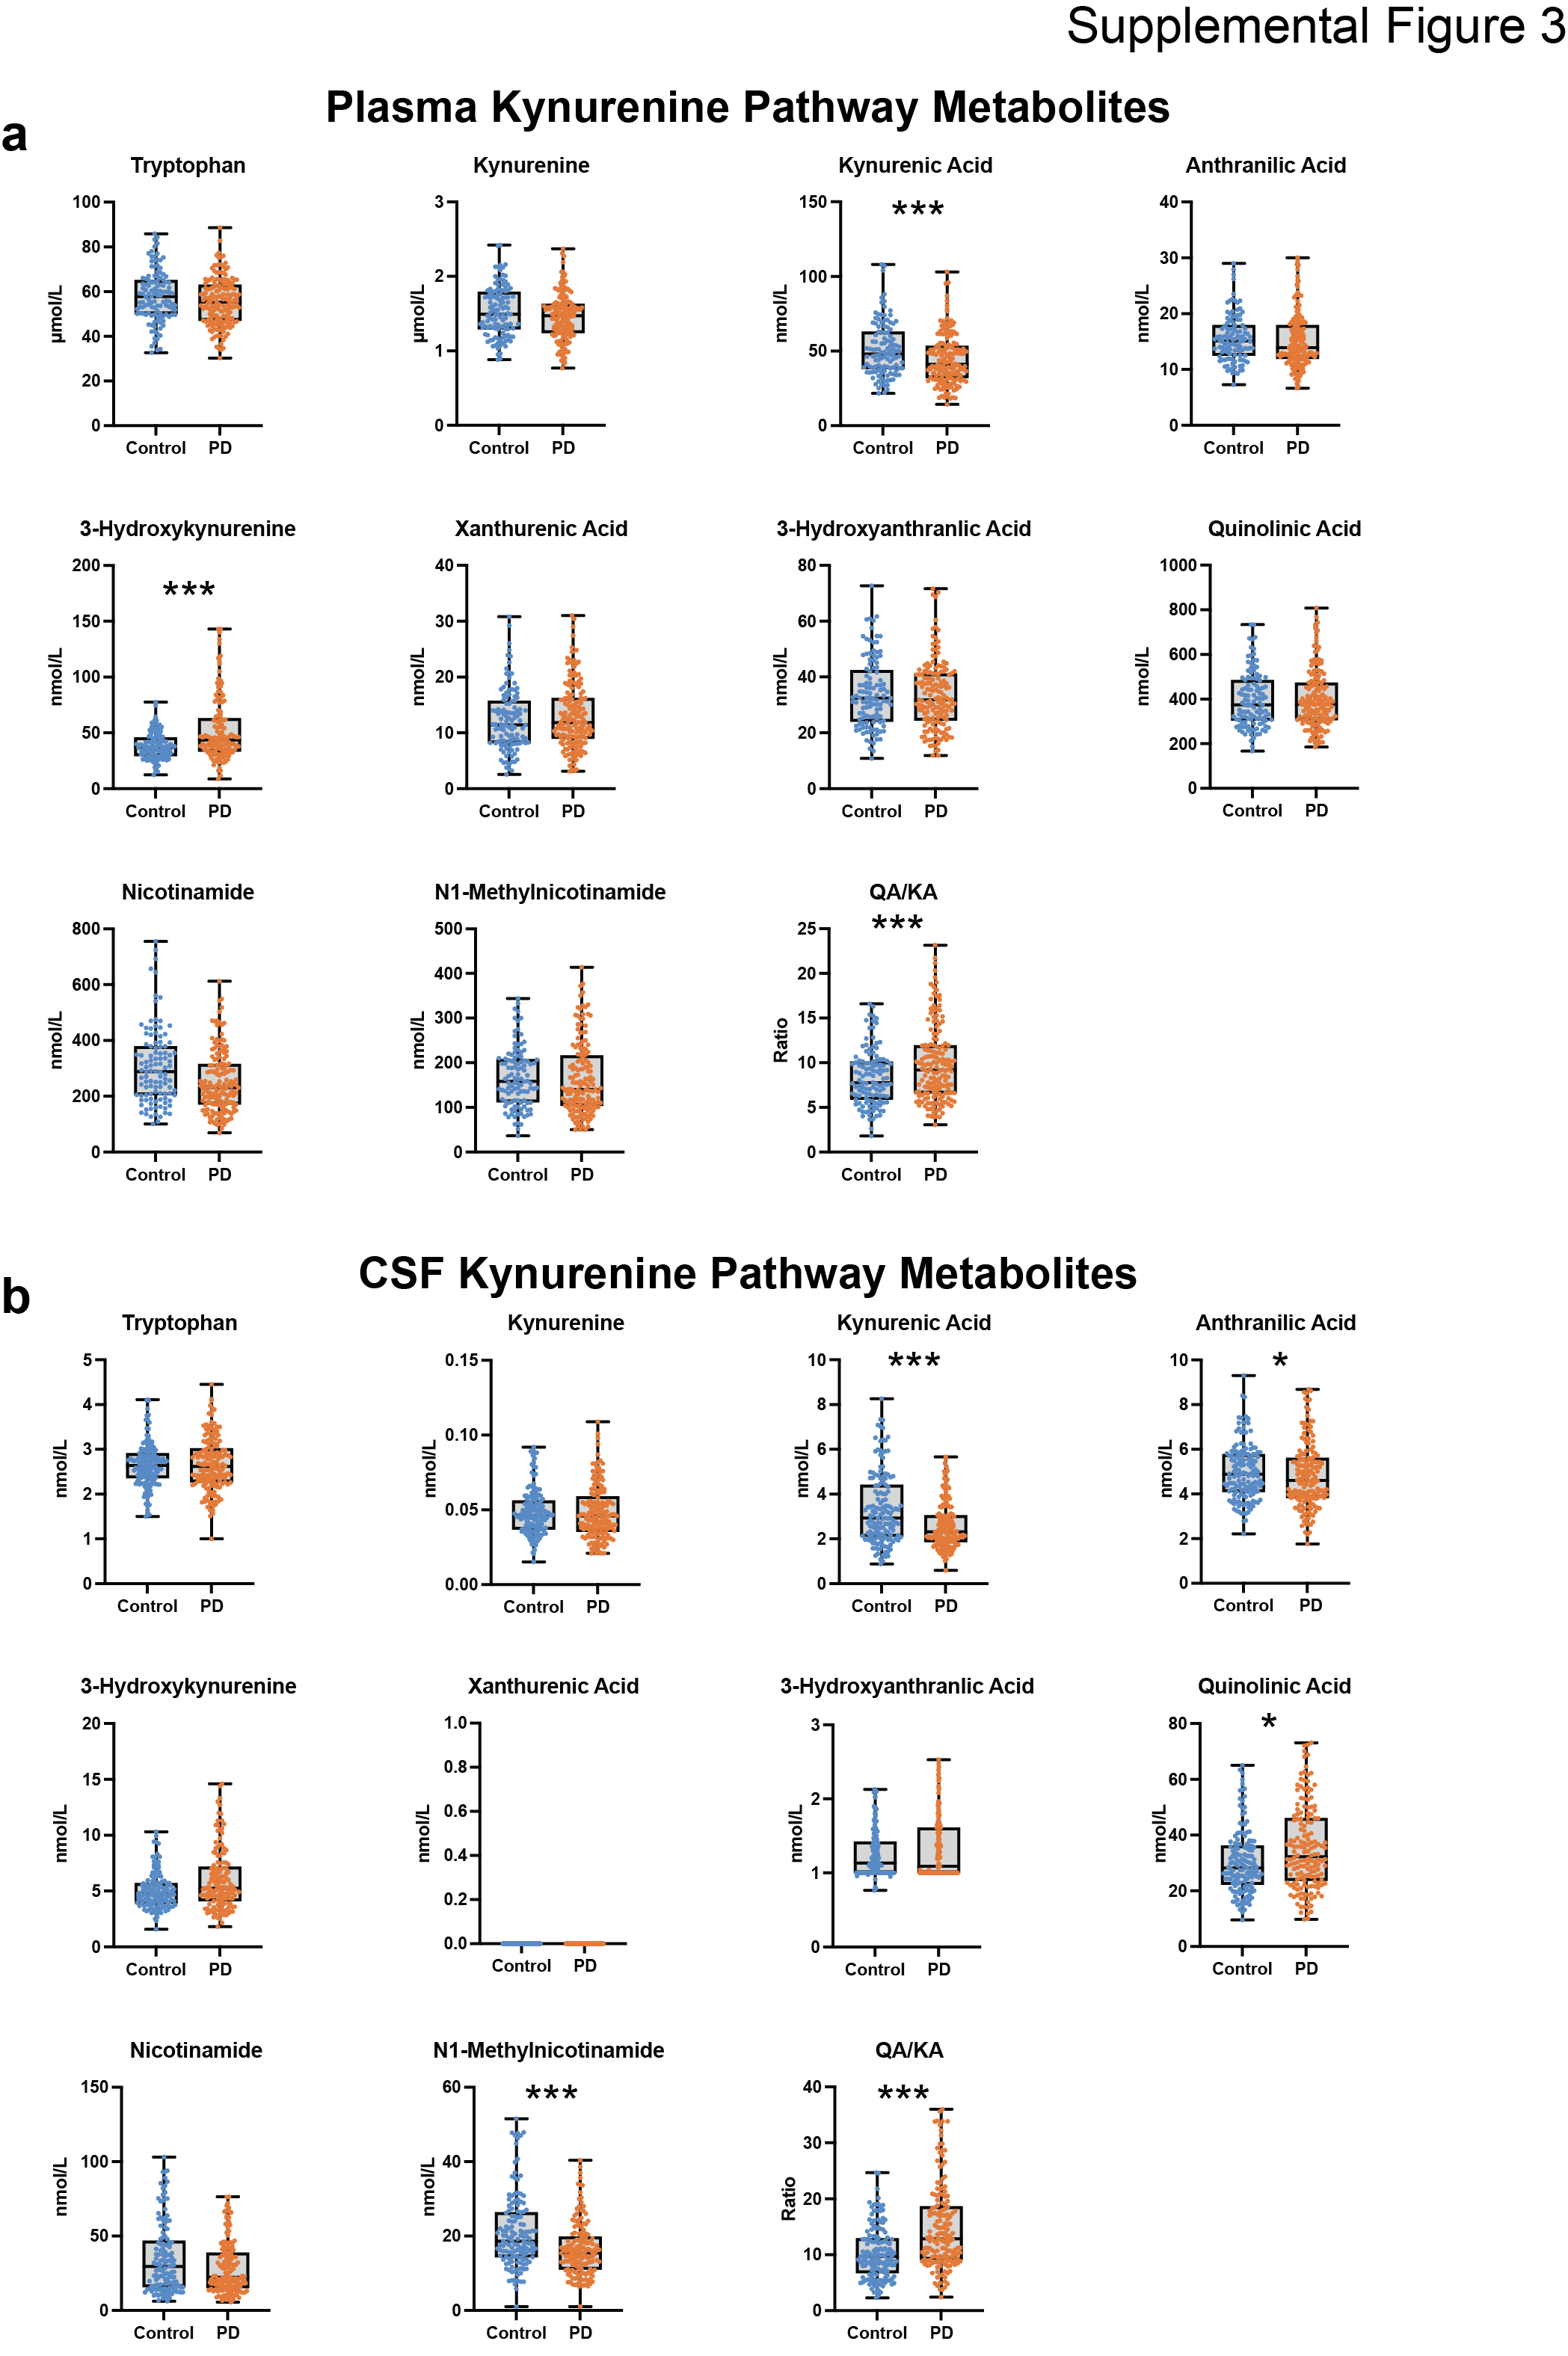
**

**Supplementary Fig. 3: KP changes in plasma and CSF metabolite pools in Parkinson’s disease.**

**(a)** Concentrations of plasma kynurenine pathway metabolites in control and PD participants. **P* < 0.05 and ****P* < 0.001 using ANCOVA including age and sex as covariates.

**(b)** Concentrations of CSF kynurenine pathway metabolites between control and PD participants. **P* < 0.05 and ****P* < 0.001 using ANCOVA including age and sex as covariates.

**
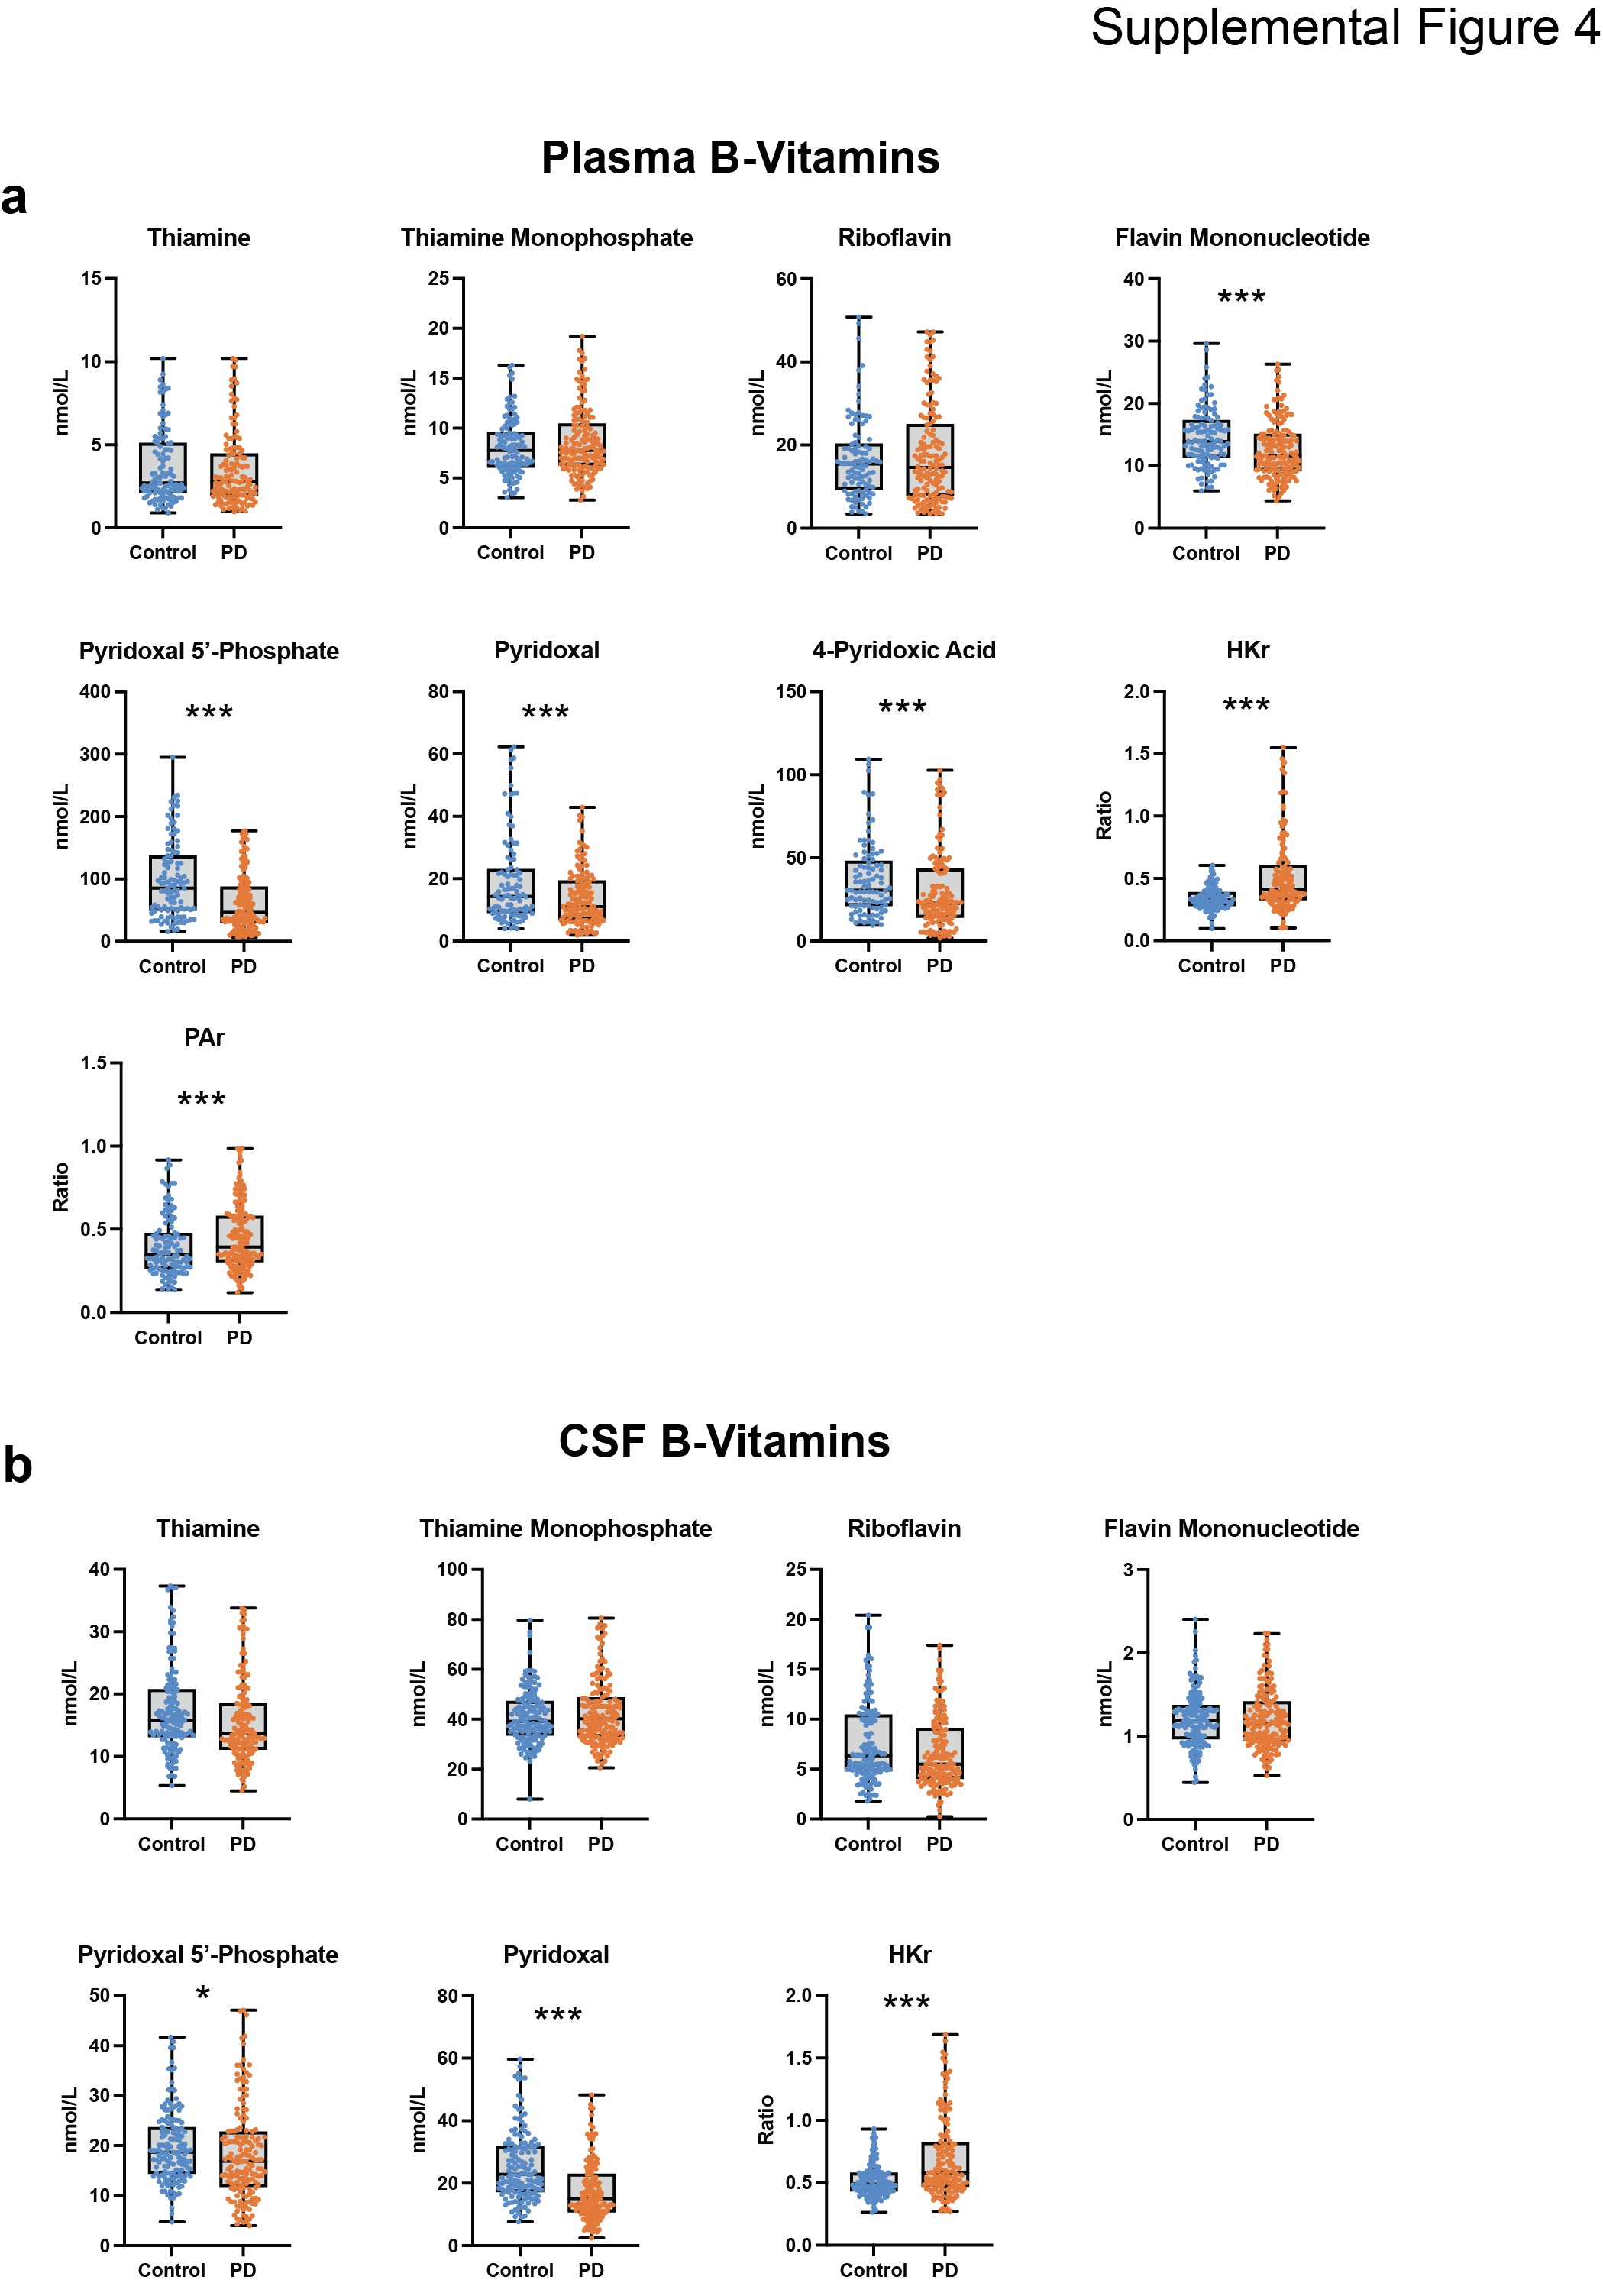
**

**Supplementary Fig. 4: Vitamin B deficiency in plasma and CSF pools in Parkinson’s disease.**

**(a)** Concentrations of plasma B-vitamins in control and PD participants. ****P* < 0.001 using ANCOVA including age and sex as covariates. Abbreviations: HKr: HK ratio; PAr: PAr Index.

**(b)** Concentrations of CSF B-vitamins between control and PD participants. **P* < 0.05 and ****P* < 0.001 using ANCOVA including age and sex as covariates. Abbreviations: HKr: HK ratio.

**
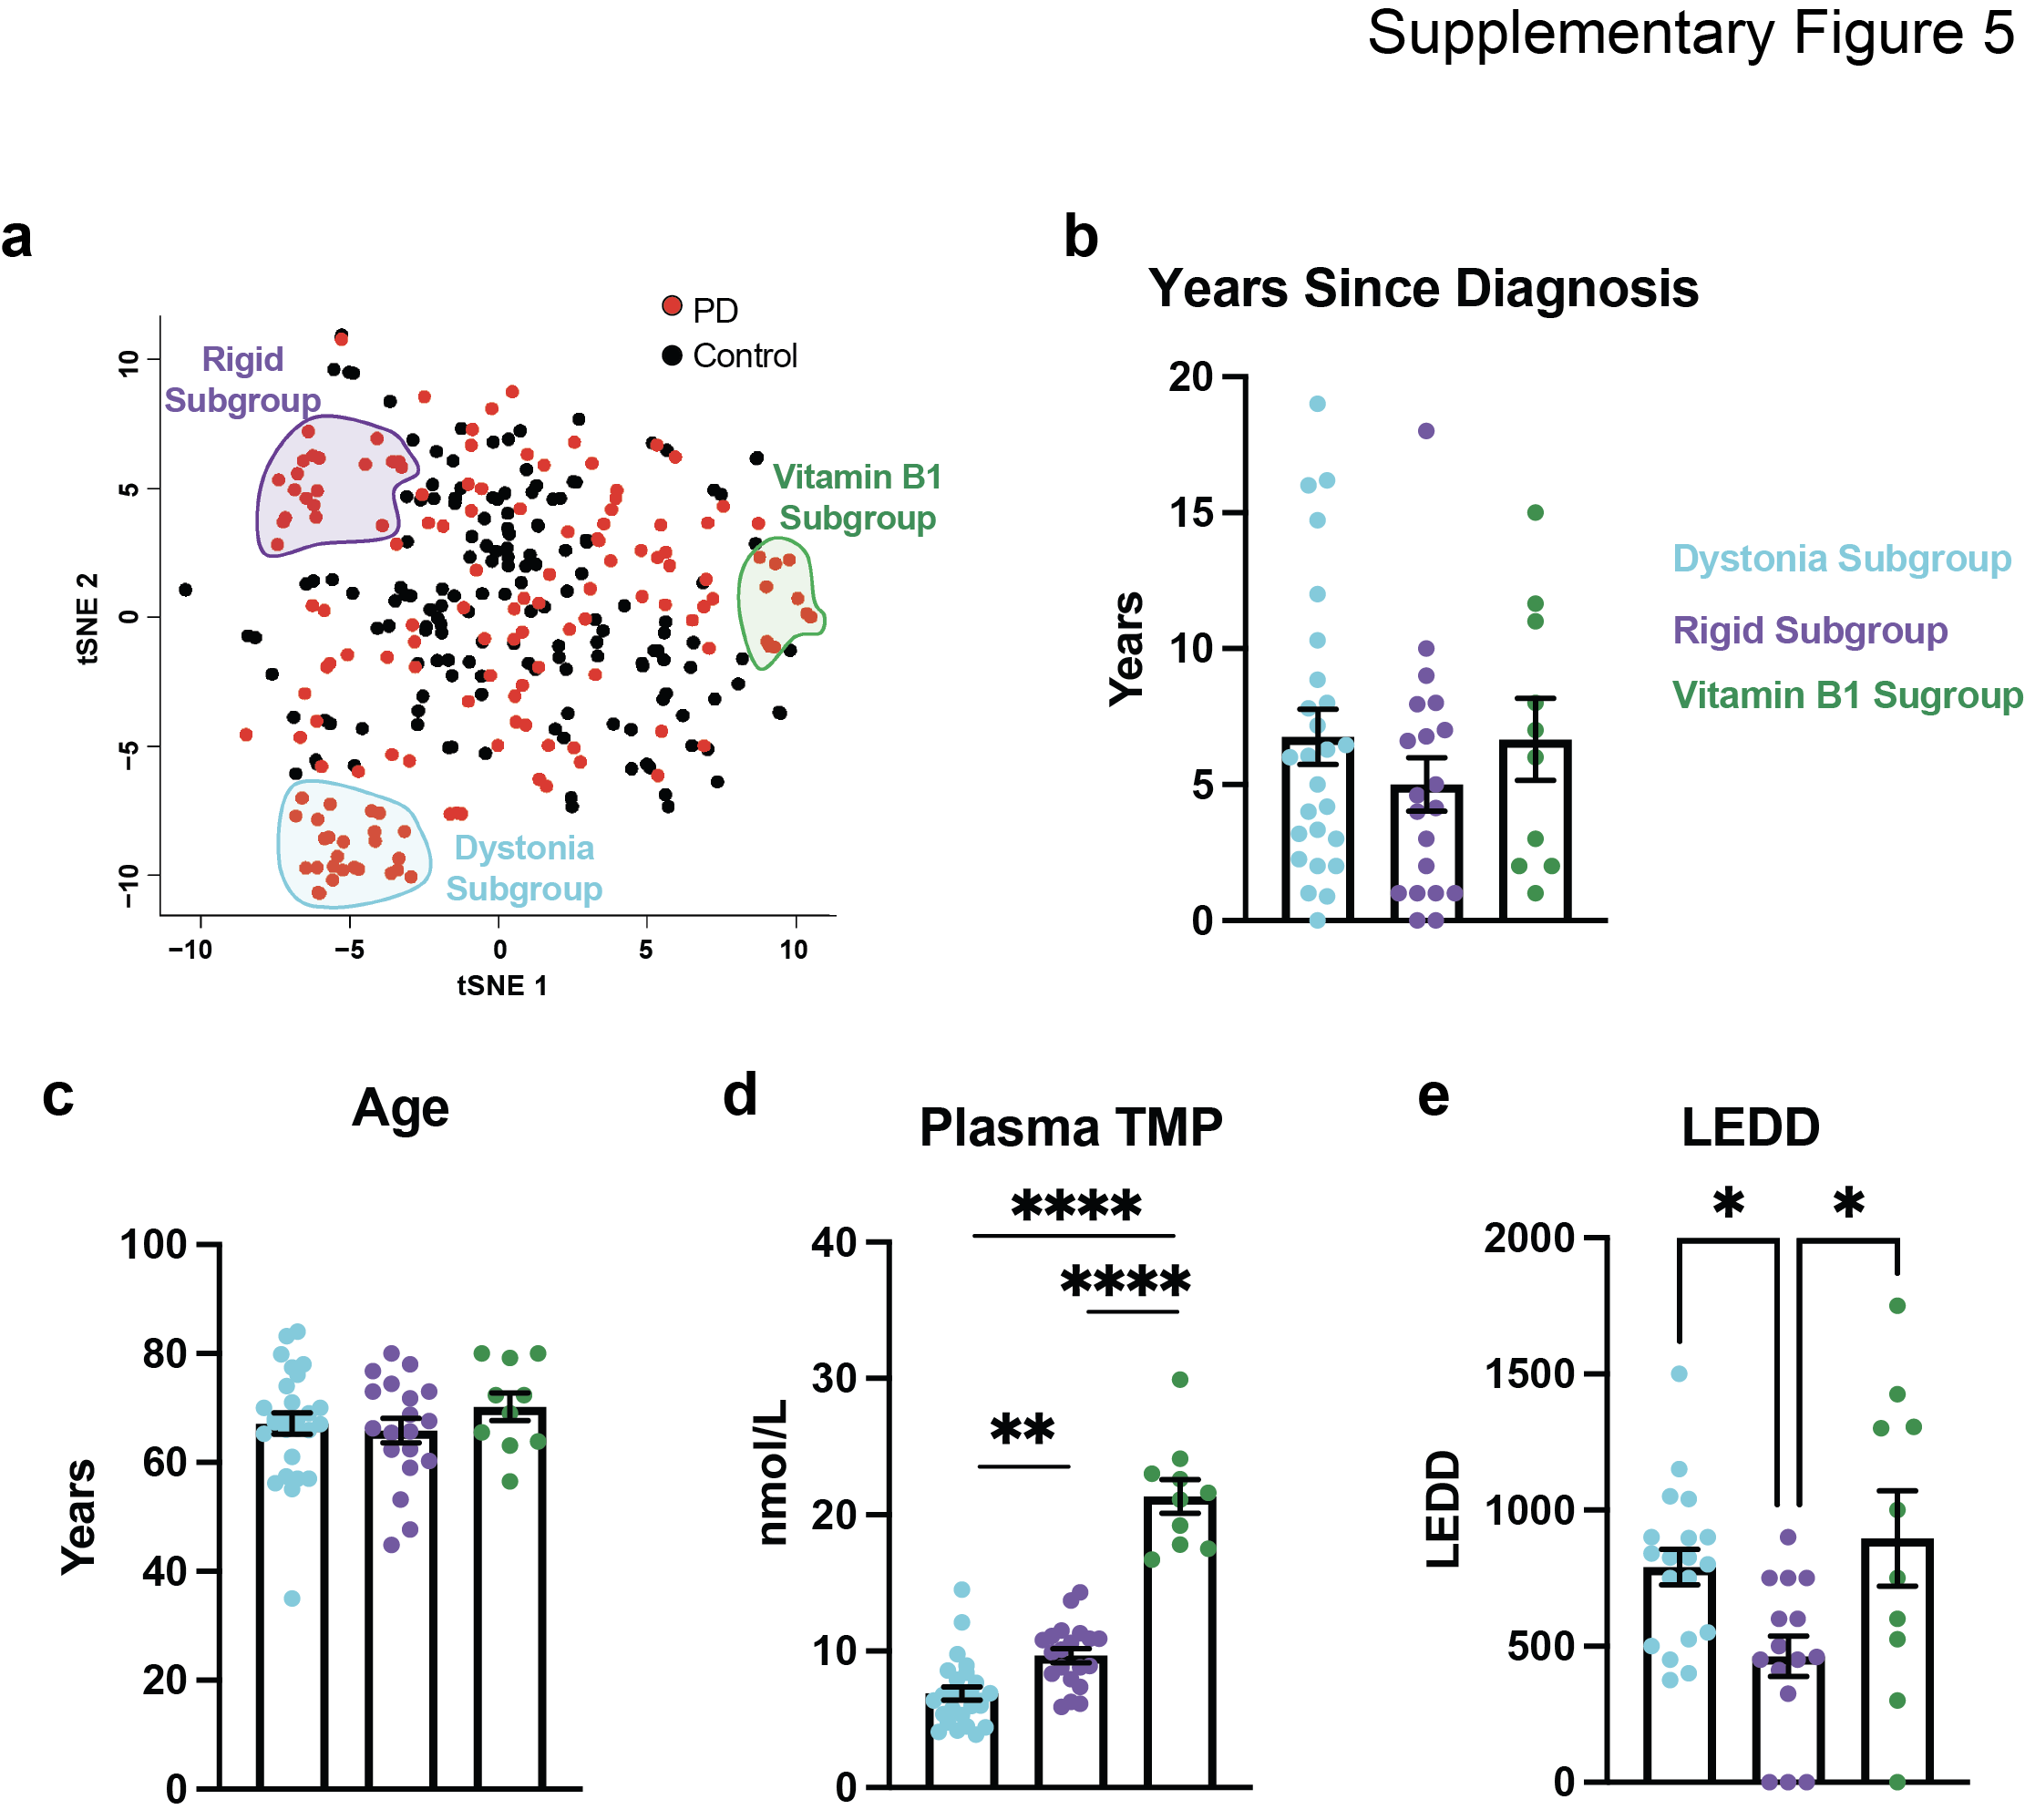
**

**Supplementary Fig. 5: Features of the PD clinical subgroups**

**(a)** tSNE clustering of the natural classes of the entire study population by blood and CSF metabolomic data uncovered three subgroups of PD participants. Control participants: black circles. PD participants: red circles. Three distinct clusters of PD participants are circled. Dystonia Subgroup: cyan, Rigid Subgroup: purple, Vitamin B1 Subgroup: green.

**(b)** Meanyears since diagnosis across the PD clinical subgroups. Group differences were assessed using one-way ANOVA with Tukey’s post hoc test for pairwise comparisons.

**(c)** Meanage (years) across the PD clinical subgroups. Group differences were assessed using one-way ANOVA with Tukey’s post hoc test for pairwise comparisons.

**(d)**  Plasma thiamine monophosphate (TMP) across the PD clinical subgroups. Group differences were assessed using one-way ANOVA with Tukey’s post hoc test for pairwise comparisons. ***P* < 0.01, *****P* < 0.0001.

**(e)** Mean levodopa equivalent daily dose (LEDD) in PD participants according to subgroups. Group differences were assessed using one-way ANOVA with Tukey’s post hoc test for pairwise comparisons. **P* < 0.05.
