# Supplementary material for: Parkinson’s disease is characterized by vitamin B6-dependent inflammatory kynurenine pathway dysfunction
Source: Research Square preprint supplement (doi:10.21203/rs.3.rs-4980210/v1), 2024-09-26
Supplement: Supplementary file 2 [file f946c45df64864672a8f9530.docx]

**Table 1.** Demographic information on the study participants

|  | **Control**  **(*n* = 158)** | **Parkinson's Disease**  **(*n*= 177)** | ***P*-value** |
| --- | --- | --- | --- |
| Age (years) | 67.70 (7.58) | 67.41 (8.23) | 0.7434a |
| Percent Male | 50.60% | 69.40% | 0.0007b |
| *APOE ε4* (% carriage) | 24.70% | 23.80% | 0.7557b |
| Years Since Diagnosis | - | 5.53 (5.18) | - |
| LEDD (mg) | - | 566.15 (394.8) | - |
| MoCA Score | 27.57 (2.01) | 24.3 (3.94) | 0.0002a |
| Education (years) | 16.53 (0.22) | 16.22 (2.42) | 0.2783a |
| MDS-UPDRS | - | 51.05 (23.18) | - |
| Part I | - | 10.56 (6.10) | - |
| Part II | - | 12.32 (8.14) | - |
| Part III (ON) | - | 25.02 (13.32) | - |
| Part III (OFF) | - | 36.13 (14.57) | - |
| Part IV | - | 2.81 (3.44) | - |
| CSF AD Biomarkers |  |  |  |
| P-Tau181 (pg/ml) | 47.9 (19.33) | 49.1 (20.39) | 0.6762a |
| Total Tau (pg/ml) | 358.62 (159.80) | 399.38 (15.41) | 0.1299a |
| Aβ42/Aβ40 | 0.103 (0.0248) | 0.110 (0.0211) | 0.0229a |
|  |  |  |  |
| Data reported as mean (SD). Abbreviations: LEDD: L-dopa equivalent daily dose; MoCA: Montreal Cognitive Assessment. | | |  |
| a: Two-tailed Student's *t* test |  |  |  |
| b: Chi-square test |  |  |  |
